# Supplementary material for: Ultrathin Bi2O2S nanosheet near-infrared photodetectors
Source: Royal Society of Chemistry journal article supplement (doi:10.1039/d0nr02991b), 2020-01-01
Supplement: d0nr02991b1.pdf [file d0nr02991b1.pdf]

## Electronic Supplementary Information

### Ultrathin $\text{Bi}_2\text{O}_2\text{S}$ Nanosheets Near-Infrared Photodetectors

Basant Chitara, Tej B. Limbu, Jason D. Orlando, Yongan Tang, and Fei Yan\*

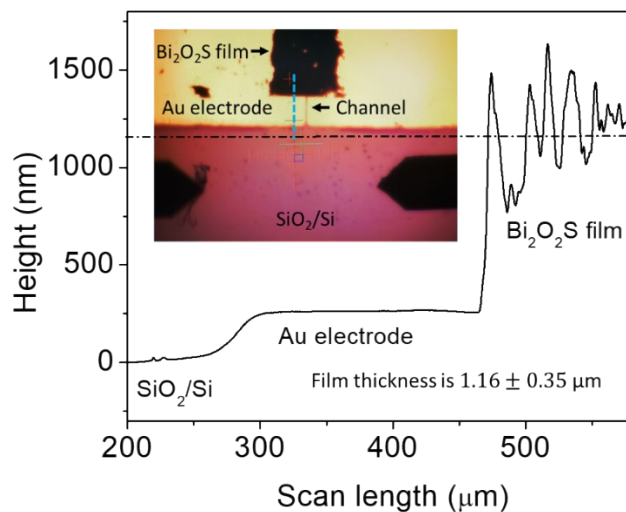

Fig. S1.  $\text{Bi}_2\text{O}_2\text{S}$  film thickness measurement using a profilometer. The scan direction and length are shown with a blue dotted line. Inset depicts the optical image of the device collected during profilometer measurement.

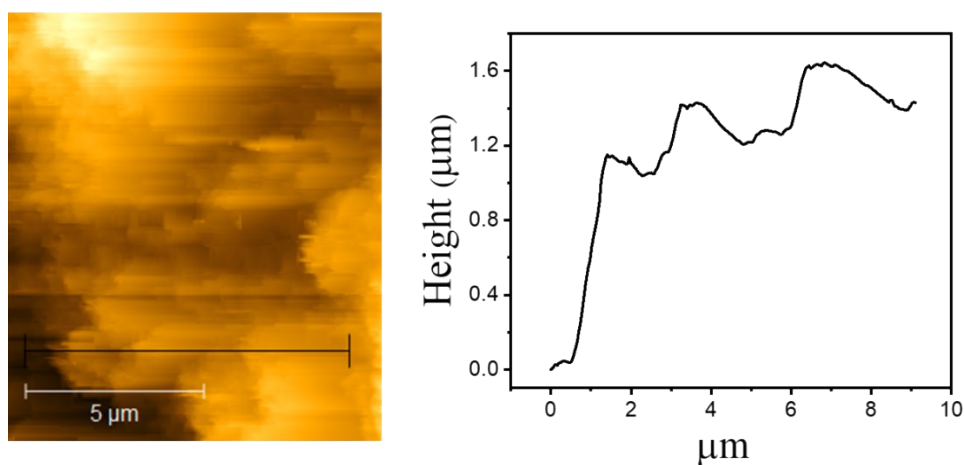

Fig. S2.  $\text{Bi}_2\text{O}_2\text{S}$  film thickness measurement by AFM with corresponding thickness profile.

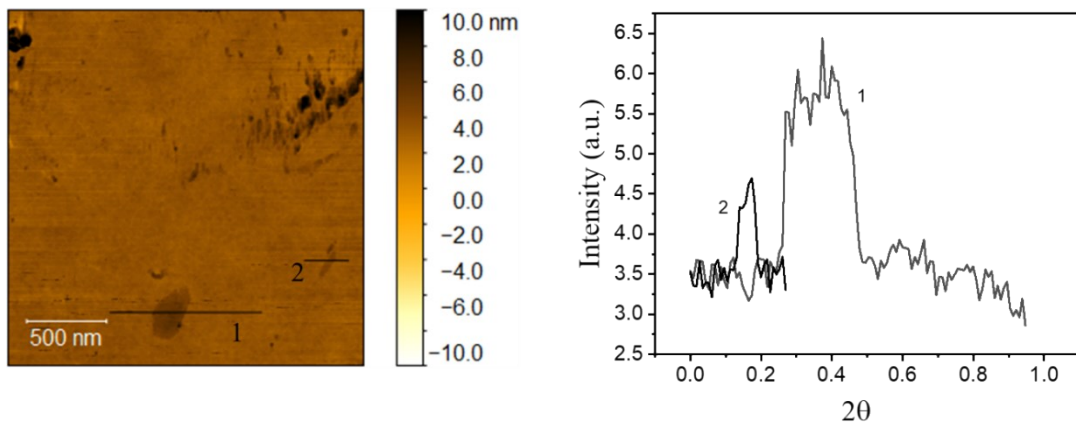

Fig. S3. AFM of the Bi<sub>2</sub>O<sub>2</sub>S nanosheets with height profiles taken at two different locations.
